# Supplementary material for: Polyalthia longifolia-mediated green synthesis of zinc oxide nanoparticles: characterization, photocatalytic and antifungal activities
Source: PubMed Central journal article supplement — RSC Adv. 2024 May 31;14(25):17535–46. doi: 10.1039/d4ra01035c (PMC11140454; doi:10.1039/d4ra01035c), 2024-05-31
Supplement: RA-014-D4RA01035C-s001.pdf [file RA-014-D4RA01035C-s001.pdf]

## Supplementary Material

### ***Polyalthia longifolia* mediated green synthesis of zinc oxide nanoparticles: Characterizations, Photocatalytic and antifungal activity**

Azam Raza<sup>1</sup>, Pieter Malan<sup>2</sup>, Irfan Ahmad<sup>3</sup>, Amir Khan<sup>4</sup>, Mohammad Haris<sup>5</sup>, Zainab Zahid<sup>1</sup>, Mohd. Jameel<sup>6</sup>, Absar Ahmad<sup>1\*</sup>, Chandra Shekhar Seth<sup>7</sup>, Tahani A. Y. Asseri<sup>8</sup>, Mohamed Hashem<sup>9</sup> and Faheem Ahmad<sup>5\*\*</sup>

<sup>1</sup>Interdisciplinary Nanotechnology Centre, Zakir Husain College of Engineering and Technology, Aligarh Muslim University, Aligarh 202002, India;

<sup>2</sup>Unit for Environmental Sciences and Management, Mafikeng Campus, North-West University, Mmabatho 2735, South Africa;

<sup>3</sup>Department of Plant Protection, Aligarh Muslim University, Aligarh 202002, India;

<sup>4</sup>S.S.L.D. Varshney Institute of Management & Engineering, Aligarh 202001, India;

<sup>5</sup>Department of Botany, Aligarh Muslim University, Aligarh 202002, India;

<sup>6</sup>Department of Zoology, Aligarh Muslim University, Aligarh 202002, India;

<sup>7</sup>Department of Botany, University of Delhi, New Delhi 110007, India;

<sup>8</sup>Department of Biology, College of Science, King Khalid University, Abha 61413, Saudi Arabia;

<sup>9</sup>Department of Botany and Microbiology, Faculty of Science, Assiut University, Assiut 71516, Egypt;

Corresponding authors:

FA\*\*: [faheem.bt@amu.ac.in](mailto:faheem.bt@amu.ac.in);

AA\*: [aahmad786in@gmail.com](mailto:aahmad786in@gmail.com)

**Table 1: Photocatalytic degradation of ZnO NPs synthesized using biological route.**

| Biological agent                       | Dye            | Light source | Time (min) | Degradation (%) |
|----------------------------------------|----------------|--------------|------------|-----------------|
| <i>Cynara scolymus</i> <sup>1</sup>    | Methylene Blue | UV- light    | 240        | 80              |
| <i>Justicia spicigera</i> <sup>2</sup> | Methylene Blue | UV- light    | 120        | 92.78           |
| <i>Vitex trifolia</i> <sup>3</sup>     | Methylene Blue | Sunlight     | 180        | 92              |
| Jujube fruit <sup>4</sup>              | Methylene Blue | Sunlight     | 300        | 92              |
| <i>Azadirachta indica</i> <sup>5</sup> | Methylene blue | UV- light    | 120        | 85              |
| <i>Boswellia mukul</i> <sup>6</sup>    | Methylene blue | UV- light    | 180        | 70              |

## References

1. K. Şendal, M. Özgür and J. Gulen, *J. Dispers.*, 2022, DOI: 10.1080/01932691.2022.2125005.
2. C. A. Soto-Robles, O. Nava, L. Cornejo, E. Lugo-Medina, A. R. Vilchis-Nestor, A. Castro-Beltrán and P. A. Luque, *J. Mol. Struct.*, 2021, **1225**, 129101.
3. K. Elumalai, S. Velmurugan, S. Ravi, V. Kathiravan and G. Adaikala Raj, *Adv. Powder Technol.*, 2015, **26**, 1639-1651.
4. M. Golmohammadi, M. Honarmand and S. Ghanbari, *Spectrochim. Acta A: Mol. Biomol. Spectrosc.*, 2020, **229**, 117961.
5. H. R. Madan, S. C. Sharma, Udayabhanu, D. Suresh, Y. S. Vidya, H. Nagabhushana, H. Rajanaik, K. S. Anantharaju, S. C. Prashantha and P. Sadananda Maiya, *Spectrochim. Acta A: Mol. Biomol. Spectrosc.*, 2016, **152**, 404-416.
6. M. Nourbakhsh and M. Darroudi, *Res. Chem. Intermed.*, 2020, **46**.
